# Supplementary material for: Composition and dynamics of the respiratory tract microbiome in intubated patients
Source: PubMed Central journal article supplement (PMC4750361; doi:10.1186/s40168-016-0151-8), 2016-02-11
Supplement: 40168_2016_151_MOESM1_ESM.pdf [file 40168_2016_151_MOESM1_ESM.pdf]

### A. Upper Respiratory Tract

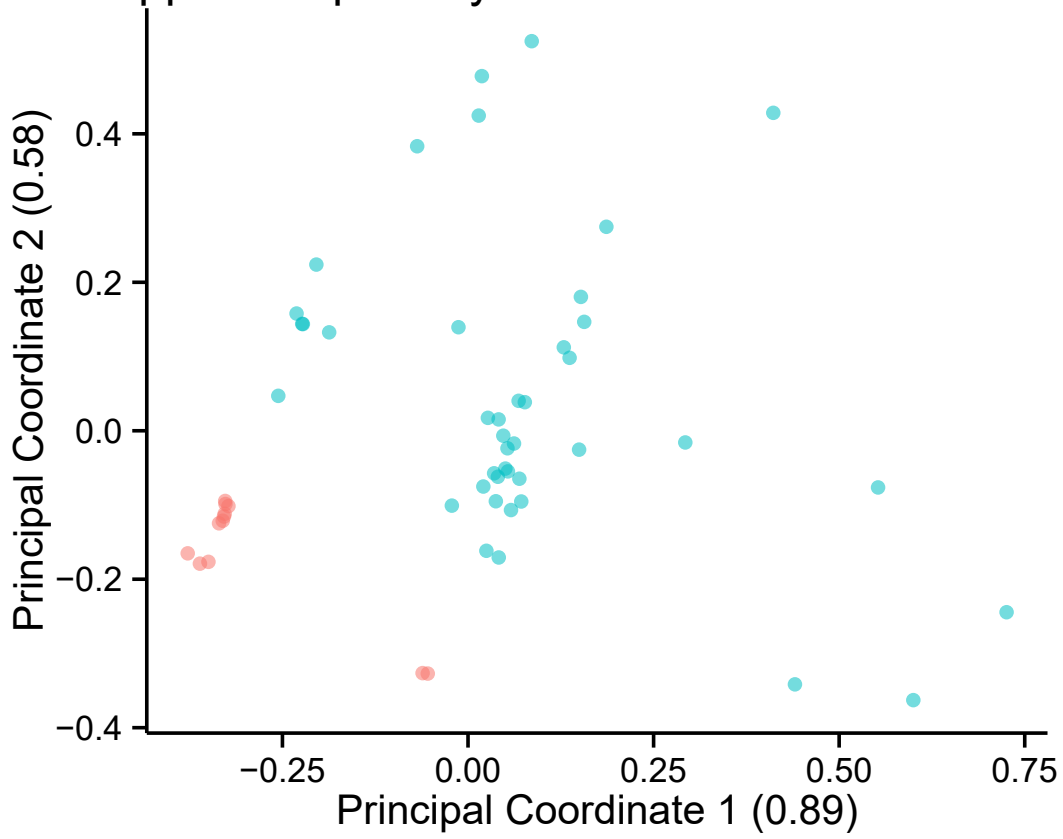

### B. Lower Respiratory Tract

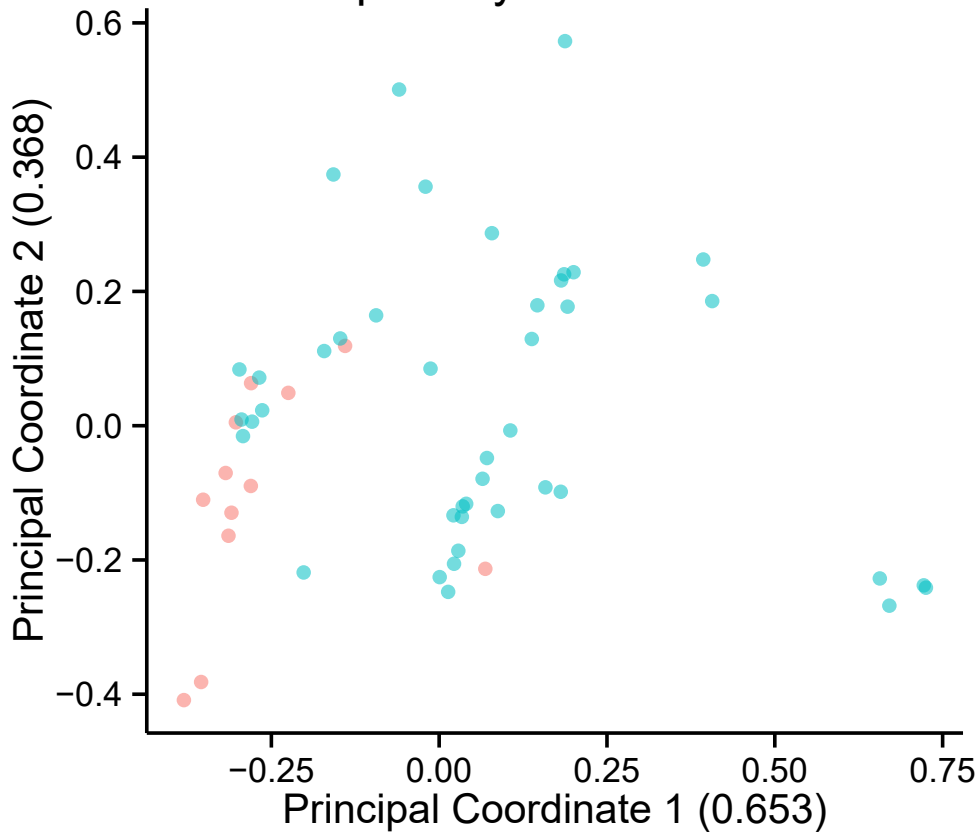

**Subject**    ● Control    ● Intubated
